# Supplementary material for: Efficacy of a nurse-led patient education intervention in promoting safety skills of patients with inflammatory arthritis treated with biologics: a multicentre randomised clinical trial
Source: RMD Open. 2022 Mar 16;8(1):e001828. doi: 10.1136/rmdopen-2021-001828 (PMC8928395; doi:10.1136/rmdopen-2021-001828)
Supplement: Supplementary data [file rmdopen-2021-001828supp002.pdf]

## Supplementary material 4 : additional results

eAppendix 1. Cormorbidities

eAppendix 2. Proportion of correct answers to the relevant safety items of the Biosecure questionnaire at 6 months

eAppendix 3. Nurse self-assessment of intervention

### eAppendix 1. Cormorbidities <sup>a</sup>

| Variable                                                                                    | Control group (n=63) |               | Intervention group (n=64) |               |
|---------------------------------------------------------------------------------------------|----------------------|---------------|---------------------------|---------------|
|                                                                                             | N <sup>b</sup>       | No. (%)       | n <sup>b</sup>            | No. (%)       |
| Arthritis (other than IA)                                                                   | 59                   | 11 (18.6)     | 64                        | 16 (25.0)     |
| Osteoporosis                                                                                | 60                   | 4 (6.7)       | 63                        | 2 (3.2)       |
| Asthma                                                                                      | 60                   | 7 (11.7)      | 62                        | 2 (3.2)       |
| Chronic obstructive pulmonary disease, acquired respiratory distress syndrome, or emphysema | 60                   | 1 (1.7)       | 63                        | 2 (3.2)       |
| Angina                                                                                      | 60                   | 1 (1.7)       | 63                        | 0 (0)         |
| Congestive heart failure (or heart disease)                                                 | 60                   | 2 (3.3)       | 63                        | 1 (1.6)       |
| Heart attack (myocardial infarct)                                                           | 60                   | 0 (0)         | 64                        | 2 (3.1)       |
| Neurological disease (such as multiple sclerosis or Parkinson's)                            | 60                   | 0 (0)         | 63                        | 0 (0)         |
| Stroke or transischemic attack                                                              | 60                   | 0 (0)         | 63                        | 1 (1.6)       |
| Peripheral vascular disease                                                                 | 60                   | 0 (0)         | 63                        | 1 (1.6)       |
| Diabetes types I and II                                                                     | 61                   | 3 (4.9)       | 63                        | 0 (0)         |
| Upper gastrointestinal disease (ulcer, hernia, reflux)                                      | 60                   | 7 (11.7)      | 63                        | 3 (4.8)       |
| Depression                                                                                  | 60                   | 4 (6.7)       | 63                        | 6 (9.5)       |
| Anxiety or panic disorder                                                                   | 58                   | 9 (15.5)      | 63                        | 12 (19.0)     |
| Visual impairment (such as cataracts, glaucoma, macular degeneration)                       | 60                   | 8 (13.3)      | 63                        | 4 (6.3)       |
| Hearing impairment (very hard of hearing, even with hearing aids)                           | 60                   | 2 (3.3)       | 63                        | 3 (4.8)       |
| Degenerative disc disease (back disease, spinal stenosis, or severe chronic back pain)      | 60                   | 15 (25.0)     | 64                        | 20 (31.3)     |
| Number of comorbidities (0-17)                                                              | 57                   |               | 61                        |               |
| 0                                                                                           |                      | 20 (35.1)     |                           | 28 (45.9)     |
| 1                                                                                           |                      | 18 (31.6)     |                           | 18 (29.5)     |
| 2                                                                                           |                      | 13 (22.8)     |                           | 6 (9.8)       |
| ≥3                                                                                          |                      | 6 (10.5)      |                           | 9 (14.8)      |
| Number of comorbidities (0-17), median [IQR]                                                | 57                   | 1.0 [0.0–2.0] | 61                        | 1.0 [0.0–1.0] |

<sup>a</sup> from the Groll Score (Groll DL, To T, Bombardier C, Wright JG. The development of a comorbidity index with physical function as the outcome. *J Clin Epidemiol* 2005;58:595-602.). <sup>b</sup>Number of available data

Abbreviation: IQR, interquartile range

## eAppendix 2. Proportion of correct answers to the relevant safety items of the Biosecure questionnaire at 6 months

| Questions                                                                                                                     | Control group<br>(n=63),<br>No. (%) | Intervention group<br>(n=64),<br>No. (%) | Absolute difference IG-CG<br>(95% CI) | Corresponding sub-scores |
|-------------------------------------------------------------------------------------------------------------------------------|-------------------------------------|------------------------------------------|---------------------------------------|--------------------------|
|                                                                                                                               | n <sup>a</sup> =59                  | n <sup>a</sup> =59                       |                                       |                          |
| 1. What is your current biologic treatment?                                                                                   | 58 (98.3)                           | 54 (91.5)                                | -6.8 (-16.3 to 2.7)                   | GK <sup>b</sup>          |
| 2. I can stop my biologic treatment if my arthritis is completely under control (in remission).                               | 27 (45.8)                           | 45 (76.3)                                | 30.5 (12.1 to 48.9)                   | Adherence                |
| 3. Infections are more common during biologic treatment.                                                                      | 38 (64.4)                           | 43 (72.9)                                | 8.5 (-9.9 to 26.8)                    | Infection                |
| 4. Among the following situations, which ones require special precautions or a change of your biologic treatment?             |                                     |                                          |                                       |                          |
| 4.2. Foreign travel                                                                                                           | 37 (62.7)                           | 44 (74.6)                                | 11.9 (-6.4 to 30.2)                   | Storage                  |
| 4.3. Having an operation                                                                                                      | 49 (83.1)                           | 55 (93.2)                                | 10.2 (-3.0 to 23.4)                   | Surgery                  |
| 4.5. Having a tooth extraction                                                                                                | 49 (83.1)                           | 54 (91.5)                                | 8.5 (-5.1 to 22.1)                    | Dental care              |
| 4.8. Planning a baby                                                                                                          | 33 (55.9)                           | 38 (64.4)                                | 8.5 (-10.8 to 27.8)                   | Conception               |
| 5. Who do I need to tell about my biologic treatment?                                                                         |                                     |                                          |                                       |                          |
| 5.1. My doctor (general practitioner)                                                                                         | 58 (98.3)                           | 59 (100)                                 | 1.7 (-3.3 to 6.7)                     | GK <sup>b</sup>          |
| 5.3. My dentist                                                                                                               | 55 (93.2)                           | 56 (94.9)                                | 1.7 (-8.5 to 11.9)                    | Dental care              |
| 5.4. The anesthetist in case of surgery                                                                                       | 56 (94.9)                           | 58 (98.3)                                | 3.4 (-4.8 to 11.6)                    | Surgery                  |
| 6. When taking a biologic, all vaccinations should be avoided.                                                                | 48 (81.4)                           | 51 (86.4)                                | 5.1 (-9.8 to 20.0)                    | Vaccines                 |
| 7. When using biologics, a woman must use effective contraception.                                                            | 22 (37.3)                           | 24 (40.7)                                | 3.4 (-15.9 to 22.7)                   | Conception               |
| 8. Which of the following situations lead to special precautions or to modifications in the management of biologic treatment? |                                     |                                          |                                       |                          |
| 8.1. High temperature/fever                                                                                                   | 55 (93.2)                           | 58 (98.3)                                | 5.1 (-3.8 to 14.0)                    | Infection                |
| 8.2. Frequent need to urinate                                                                                                 | 26 (44.1)                           | 33 (55.9)                                | 11.9 (-7.7 to 31.5)                   | Infection                |
| 8.4. A cough                                                                                                                  | 44 (74.6)                           | 49 (83.1)                                | 8.5 (-7.9 to 24.8)                    | Infection                |
| 8.5. Out of breath for no apparent reason                                                                                     | 35 (59.3)                           | 39 (66.1)                                | 6.8 (-12.3 to 25.9)                   | Infection                |
| 8.7. Have a burning sensation while urinating                                                                                 | 38 (64.4)                           | 49 (83.1)                                | 18.6 (1.4 to 35.9)                    | Infection                |
| 9. Case no. 1. Fever. Cathy                                                                                                   |                                     |                                          |                                       |                          |
| 9.1 Cathy takes the treatment prescribed for her husband, since it was effective for him.                                     | 54 (91.5)                           | 55 (93.2)                                | 1.7 (-9.6 to 13.0)                    | Infection                |
| 9.2 She waits a few days before contacting the doctor because her husband and daughter recovered in a few days.               | 42 (71.2)                           | 43 (72.9)                                | 1.7 (-16.2 to 19.6)                   | Infection                |
| 9.3 She has her biologic treatment (injection or infusion) because it's only a virus.                                         | 39 (66.1)                           | 49 (83.1)                                | 16.9 (-0.2 to 34.1)                   | Infection                |
| 10. Case no. 2. Bronchitis. Paul                                                                                              |                                     |                                          |                                       |                          |
| 10.1 Paul was right not to take his biologic treatment.                                                                       | 51 (86.4)                           | 55 (93.2)                                | 6.8 (-5.8 to 19.3)                    | Infection                |
| 10.2 Paul was right to start antibiotics as soon as possible.                                                                 | 52 (88.1)                           | 54 (91.5)                                | 3.4 (-9.2 to 16.0)                    | Infection                |
| 10.3 If Paul has bronchitis again, he will know which antibiotics he can take in case his doctor is not available.            | 46 (78.0)                           | 54 (91.5)                                | 13.6 (-0.9 to 28.0)                   | Infection                |
| 10.4 Paul can have his biologic treatment tomorrow if he starts the antibiotics today                                         | 44 (74.6)                           | 47 (79.7)                                | 5.1 (-11.7 to 21.9)                   | Infection                |
| 10.5 Paul was right to call his doctor                                                                                        | 59 (100)                            | 56 (94.9)                                | -5.1 (-12.4 to 2.2)                   | Infection                |
| 11. Case no. 3. Stopping biologics. Christine                                                                                 |                                     |                                          |                                       |                          |
| 11.1 I will start my biologic again.                                                                                          | 44 (74.6)                           | 50 (84.7)                                | 10.2 (-5.9 to 26.3)                   | Adherence                |

|                                                                                                             |           |           |                      |           |
|-------------------------------------------------------------------------------------------------------------|-----------|-----------|----------------------|-----------|
| 11.2 If my arthritis has not been painful for 3 weeks, it probably means that it is cured.                  | 53 (89.8) | 52 (88.1) | -1.7 (-14.7 to 11.3) | Adherence |
| 12. Case no. 4. Flu vaccination.                                                                            |           |           |                      |           |
| 12.1 I will get the flu vaccine.                                                                            | 40 (67.8) | 54 (91.5) | 23.7 (8.2 to 39.3)   | Vaccines  |
| 12.2 I am more likely to have a reaction to the flu jab due to my biologic treatment.                       | 34 (57.6) | 36 (61.0) | 3.4 (-16.0 to 22.8)  | Vaccines  |
| 12.3 I have to avoid the flu vaccine because of my biologic treatment.                                      | 49 (83.1) | 50 (84.7) | 1.7 (-13.3 to 16.6)  | Vaccines  |
| 13. Case no. 5. Wounds.                                                                                     |           |           |                      |           |
| 13.1 The wound needs to be cleansed and dressed straight away                                               | 59 (100)  | 59 (100)  | .                    | Infection |
| 13.2 The wound is more likely to go septic because of the biologic therapy.                                 | 46 (78.0) | 50 (84.7) | 6.8 (-8.9 to 22.5)   | Infection |
| 13.3 Bill must take antibiotics straight away.                                                              | 36 (61.0) | 40 (67.8) | 6.8 (-12.1 to 25.7)  | Infection |
| 13.4 Bill can have the tetanus vaccine, even though he is treated with a biologic.                          | 30 (50.8) | 42 (71.2) | 20.3 (1.4 to 39.2)   | Vaccines  |
| 14. Case no. 6                                                                                              |           |           |                      | Surgery   |
| 14. 1 The surgery should definitely be avoided.                                                             | 40 (67.8) | 50 (84.7) | 16.9 (0.2 to 33.7)   | Surgery   |
| 14.2 Sarah agrees with the scheduled date for the operation, the sooner the better.                         | 32 (54.2) | 40 (67.8) | 13.6 (-5.6 to 32.7)  | Surgery   |
| 14.3 Sarah refuses the scheduled date because she needs to think about stopping her biologic therapy first. | 44 (74.6) | 48 (81.4) | 6.8 (-9.8 to 23.4)   | Surgery   |
| 14.4 Sarah informs the surgeon about her biologic therapy.                                                  | 59 (100)  | 56 (94.9) | -5.1 (-12.4 to 2.2)  | Surgery   |
| 14.5 Sarah informs the anesthetist about her biologic therapy.                                              | 58 (98.3) | 56 (94.9) | -3.4 (-11.6 to 4.8)  | Surgery   |
| 15. Conservation.                                                                                           | 56 (94.9) | 57 (96.6) | 1.7 (-7.3 to 10.7)   | Storage   |
| 16. Case no. 7                                                                                              |           |           |                      | Infection |
| 16.1. Aseptia                                                                                               | 52 (88.1) | 56 (94.9) | 6.8 (-4.9 to 18.4)   | Infection |

<sup>a</sup> Number of available data. <sup>b</sup> GK: general knowledge (not attributed in sub scores).

Responses to the last question of the Biosecure questionnaire are not presented because of a too small number of responses.

Sub-scores: adherence-related sub-score includes questions 2;11.1;11.1. Infections sub-score includes questions 3; 8.1;8.2;8.4;8.5;8.7;9.1-9.3;10.1-10.5;13.1-13.3;16.1. Vaccination sub-score includes questions 6;12.2;12.3;13.4. Surgery & dental care sub-score includes questions 4.3-4.5;5.3;5.4;14.1-14.5. child conception includes questions 4.8;7. Storage & cold chain maintenance sub-score includes questions 4.2;15.

The decoy not relevant questions 4.1;4.4;4.6;4.7;5.2;5.5;5.6;8.3;8.6;8.8;8.9 are not presented.

Abbreviations: IG, intervention group; CG, control group

### eAppendix 3. Nurse self-assessment of intervention

|                                                                  | Baseline (n=64)  |                  | At 3 months (n=59) |                  |
|------------------------------------------------------------------|------------------|------------------|--------------------|------------------|
|                                                                  | No. <sup>a</sup> | No. (%)          | No. <sup>a</sup>   | No. (%)          |
| Interview with the nurse                                         | 64               |                  | 54                 |                  |
| Free-style                                                       |                  | 31 (48.4)        |                    | 24 (44.4)        |
| Semi-structured                                                  |                  | 33 (51.6)        |                    | 30 (55.6)        |
| Discussion on expectations, fears, motivations fully carried out | 64               | 64 (100)         | 54                 | 53 (98.1)        |
| Education session fully carried out                              | 63               | 62 (98.4)        | 54                 | 53 (98.1)        |
| <i>Education session: skills</i>                                 |                  | <b>Discussed</b> |                    | <b>Discussed</b> |
| Name the bDMARD                                                  | 64               | 63 (98.4)        | 63                 | 55 (87.3)        |
|                                                                  |                  |                  | 54                 | 53 (98.1)        |
|                                                                  |                  |                  | 53                 | 51 (96.2)        |

|                                                    |    |           |    |           |    |           |    |           |
|----------------------------------------------------|----|-----------|----|-----------|----|-----------|----|-----------|
| Fever, infections, antibiotics                     | 64 | 64 (100)  | 64 | 47 (73.4) | 54 | 53 (98.1) | 54 | 49 (90.7) |
| Vaccination                                        | 64 | 63 (98.4) | 64 | 45 (70.3) | 54 | 50 (92.6) | 54 | 45 (83.3) |
| Dental care                                        | 64 | 64 (100)  | 64 | 44 (68.8) | 54 | 53 (98.1) | 54 | 49 (90.7) |
| Surgery                                            | 64 | 64 (100)  | 64 | 48 (75.0) | 54 | 52 (96.3) | 54 | 44 (81.5) |
| Planning pregnancy                                 | 61 | 48 (78.7) | 53 | 38 (71.7) | 48 | 30 (62.5) | 41 | 32 (78.0) |
| Who to call                                        | 64 | 64 (100)  | 64 | 55 (85.9) | 53 | 51 (96.2) | 53 | 51 (96.2) |
| Follow-up                                          | 64 | 64 (100)  | 64 | 52 (81.3) | 54 | 53 (98.1) | 53 | 49 (92.5) |
| Self-injection, asepsis                            | 64 | 62 (96.9) | 62 | 50 (80.6) | 54 | 53 (98.1) | 54 | 47 (87.0) |
| Travel                                             | 64 | 63 (98.4) | 63 | 42 (66.7) | 54 | 48 (88.9) | 54 | 42 (77.8) |
| Storage, cold-chain                                | 64 | 64 (100)  | 64 | 57 (89.1) | 54 | 53 (98.1) | 54 | 51 (94.4) |
| <i>At the end of the interview, nurse's advice</i> |    |           |    |           |    |           |    |           |
| Self-injection by the patient themselves           | 63 | 48 (76.2) |    |           | 53 | 44 (83.0) |    |           |
| Doctor's prescription for the injection by a nurse | 62 | 16 (25.8) |    |           | 53 | 7 (13.2)  |    |           |
| <sup>a</sup> Number of available data.             |    |           |    |           |    |           |    |           |

The information booklet was provided by 61/63 nurses (96.8%). At 6 months, 85.5 % and 91.4% patients in the control and intervention groups reported that they had received an information leaflet at baseline and 73.6% and 80.7% considered themselves able to self-inject.

At 6 months, 93.2% and 86.4% of the intervention and control groups were still receiving bDMARDs.
